# Supplementary material for: Engineering of biofilms with a glycosylation circuit for biomaterial applications
Source: Royal Society of Chemistry journal article supplement (doi:10.1039/d0bm02192j), 2021-01-01
Supplement: d0bm02192j1.pdf [file d0bm02192j1.pdf]

## Supplementary Information

### Engineering of Biofilms with a Glycosylation Circuit for Biomaterial Applications

Ebru Sahin Kehribar<sup>1</sup>, Musa Efe Isilak<sup>1</sup>, Eray Ulas Bozkurt<sup>1</sup>, Jozef Adamcik<sup>2</sup>, Raffaele Mezzenga<sup>2</sup>, Urartu Ozgur Safak Seker<sup>1\*</sup>

<sup>1</sup>UNAM- Institute of Materials Science and Nanotechnology, Bilkent University, Ankara, Turkey.

<sup>2</sup>ETH Zurich, Department of Health Sciences and Technology, 8092 Zurich, Switzerland  
Department of Materials, ETH Zurich, 8093 Zurich, Switzerland

\*e-mail: [urartu@bilkent.edu.tr](mailto:urartu@bilkent.edu.tr)

#### Supplementary Table 1. List of primers used in this study.

|                        |         |                                                                            |
|------------------------|---------|----------------------------------------------------------------------------|
| DQNA<br>T_pet22<br>b_F | Forward | 5'AAAAAACCTAGGGGCGGTAGCGGTGATCAGAACGCGACCACTAGT<br>TGAGATCCGGCTGCTAACAA 3' |
| DQNA<br>T_pet22<br>b_R | Reverse | 5'AAAAAAGAGCTCGGCCATCGCCGGCTGG 3'                                          |
| TasA-<br>DQNAT-<br>F   | Forward | 5'AAAAAAGAGCTCATGGCATTAAACGACATTAAATCAAAGGATGC 3'                          |
| TasA-<br>DQNAT-<br>R   | Reverse | 5'AAAAAACCTAGGGTGGTGGTGGTGGTGGTG 3'                                        |

#### Supplementary Table 2. Aminoacid sequences of proteins used in this study. Color coded aminoacids correspond to genetic parts with the same color code

---

Tas MAFNDIKSKDATFASGTLDSLAKENSASVNLNLKPGDKLTKDFQFENNGSLAIKEVL  
A MALNYGDFKANGGSNTSPEDFLSQFEVTLTLLTVGKEGGNGYPKNIILDDANLKDLYLM  
pro SAKNDAAAEEKIKKQIDPKFLNASGKVVNATIDGKTAPEYDGVPKTPTDFDQVQMEIQ  
tei FKDDKTKDEKGLMVQNKYQGNISIKLQFSFEATQWNGLTIKKDHTDKDGYVKENEKA  
n HSEDKNGGSGLEHHHHHH\*  
wit  
h C

---

ter  
mi  
nal  
pol  
yhi  
stid  
ine  
tag

---

Tas MKYLLPTAAAGLLLLAAQPAMAEELMAFNDIKSKDATFASGTLDSLAKENSASVNL  
A- KPGDKLTKDFQFENNGSLAIKEVLMALNYGDFKANGGSNTSPEDFLSQFEVTLTVG  
DQ KEGGNGYPKNIILDDANLKDLYLMSAKNDAAAAEKIKKQIDPKFLNASGKVN  
VATIDGK NA TAPEYDGVPKTPTDFDQVQMEIQFKDDTKDEKGLMVQNKYQGN  
SIKLQFSFEATQ T WNGLTIKKDHTDKDGYVKENEKAHSEDKNGGSGLE  
HHHHHHPRGGSGDQNATTS\*

pro  
tein  
wit  
h  
*pel*  
*B*  
*per*  
*ipla*  
*sm*  
*loc*  
*aliz*  
*atio*  
*n*  
*sig*  
*nal,*  
DQ  
NA  
T  
gly  
cos  
ylat  
ion  
mo  
tif  
at  
the  
C-  
ter

---

---

min  
us  
an  
d  
pol  
yhi  
stid  
ine  
tag  
.

---

**Supplementary Table 3. Desorption constant ( $k_d$ ) of differently aged TasA, TasA D and TasA DP samples.**

|         | $k_d$ ( $\mu\text{M}$ ), mean $\pm$ SD |                 |                 |                 |
|---------|----------------------------------------|-----------------|-----------------|-----------------|
|         | Day 1                                  | Day 7           | Day 14          | Day 28          |
| TasA    | 2.94 $\pm$ 0.19                        | 5.22 $\pm$ 0.07 | 5.12 $\pm$ 0.54 | 3.39 $\pm$ 0.09 |
| TasA D  | 3.83 $\pm$ 0.06                        | 4.24 $\pm$ 0.13 | 4.10 $\pm$ 0.15 | 3.03 $\pm$ 0.14 |
| TasA DP | 1.48 $\pm$ 0.07                        | 1.62 $\pm$ 0.07 | 1.70 $\pm$ 0.18 | 1.32 $\pm$ 0.06 |

**Supplementary Table 4. Gibbs free energy ( $\Delta G^\circ$ ) calculations of differently aged TasA, TasA D and TasA DP samples.**

|         | $\Delta G^\circ$ (kcal/mol), mean $\pm$ SD |                  |                  |                  |
|---------|--------------------------------------------|------------------|------------------|------------------|
|         | Day 1                                      | Day 7            | Day 15           | Day 28           |
| TasA    | -3.28 $\pm$ 0.02                           | -3.13 $\pm$ 0.01 | -3.13 $\pm$ 0.03 | -3.24 $\pm$ 0.01 |
| TasA D  | -3.21 $\pm$ 0.01                           | -3.18 $\pm$ 0.01 | -3.19 $\pm$ 0.01 | -3.27 $\pm$ 0.01 |
| TasA DP | -3.45 $\pm$ 0.01                           | -3.43 $\pm$ 0.01 | -3.42 $\pm$ 0.03 | -3.48 $\pm$ 0.01 |

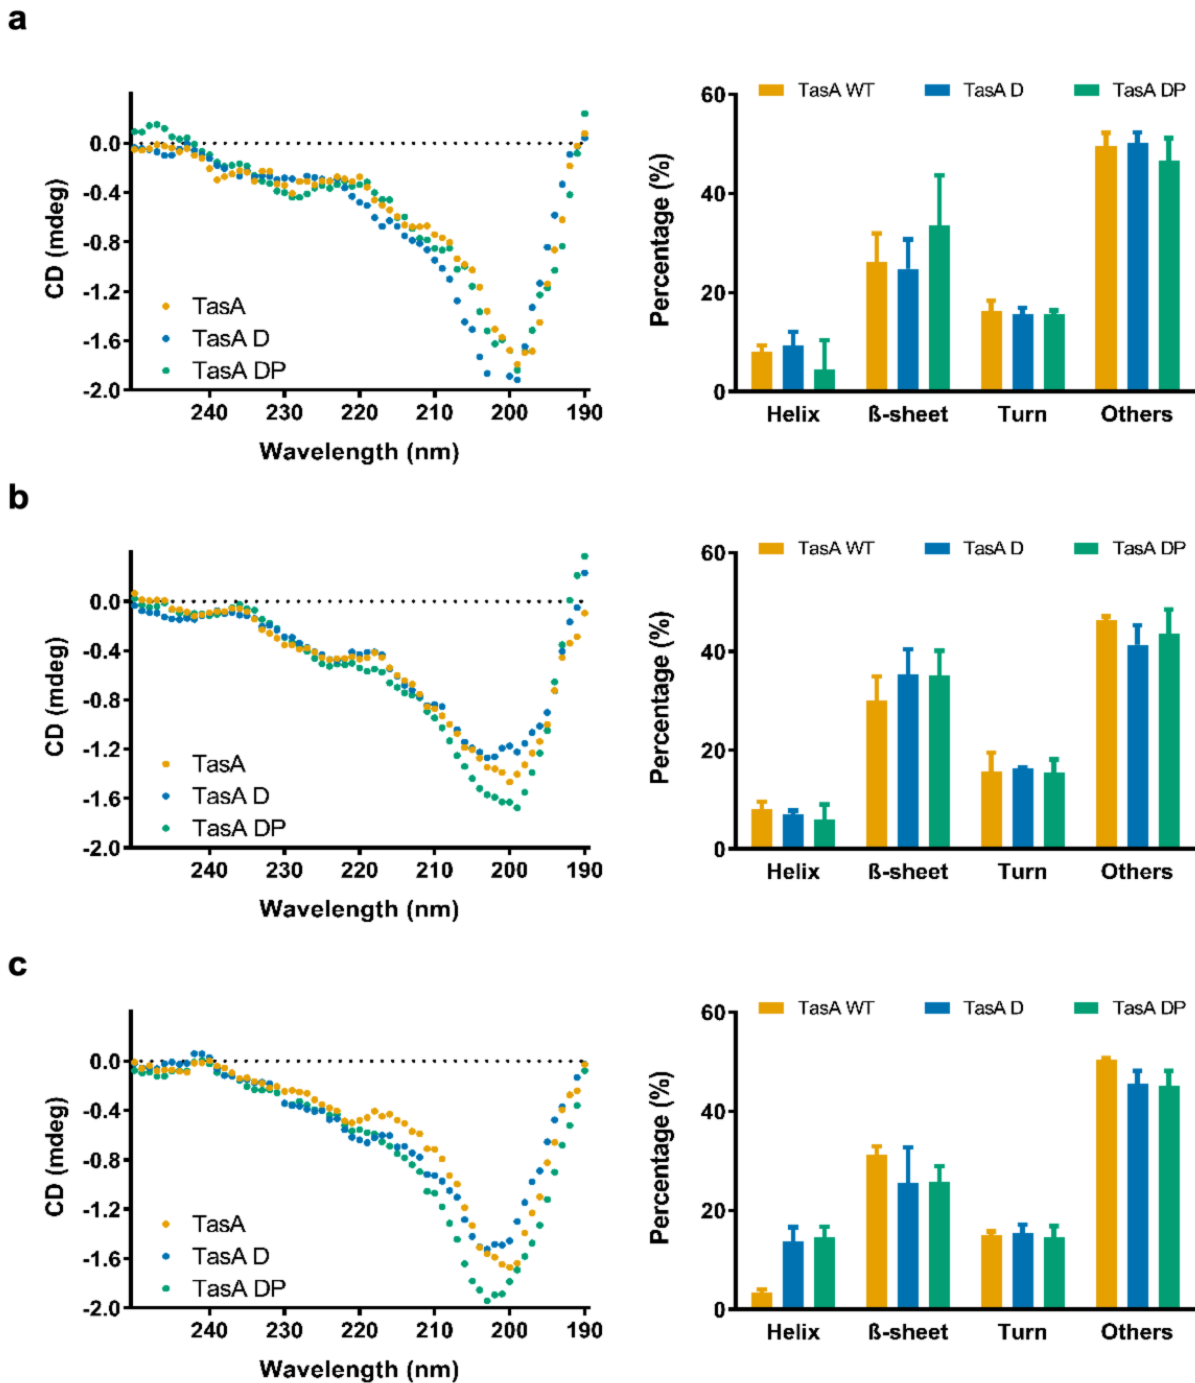

**Supplementary Figure 1. Circular dichroism spectra of TasA (orange dots), TasA-D (blue dots) and TasA-DP (green dots) samples and percentages of secondary structures calculated by BestSel online tool for TasA (orange bars), TasA-D (blue bars) and TasA-DP (green bars) with aging durations of a. 1 day b. 7 days and c. 28 days. n=3.**

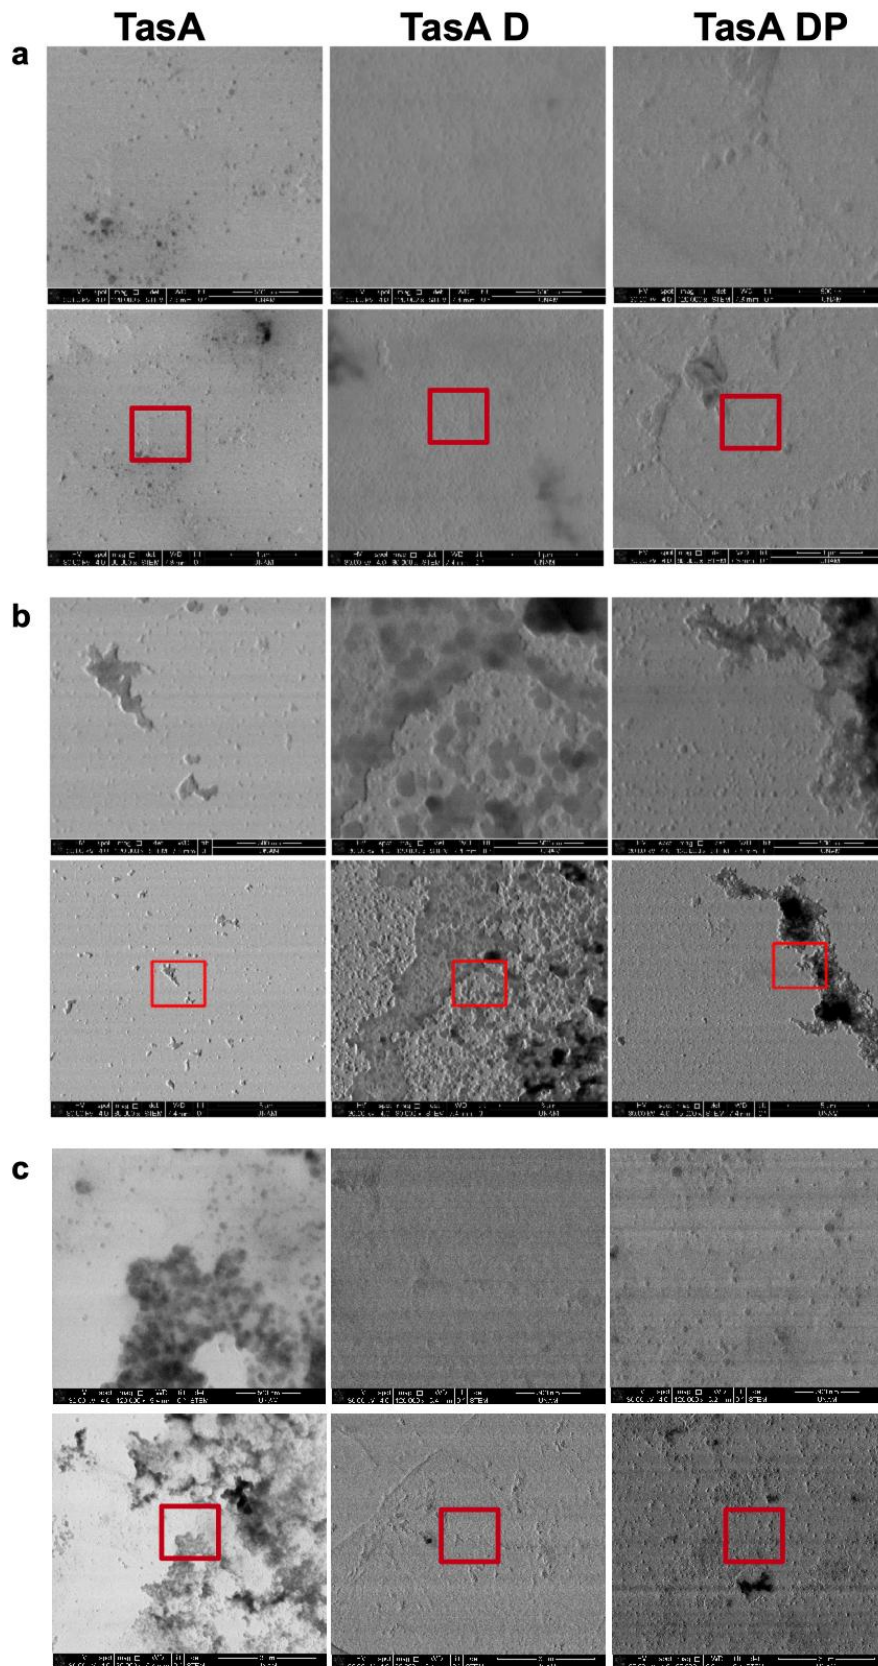

**Supplementary Figure 2. STEM of images of a. 1 day b. 7 days and c. 28 days old TasA, TasA D and TasA DP samples.**

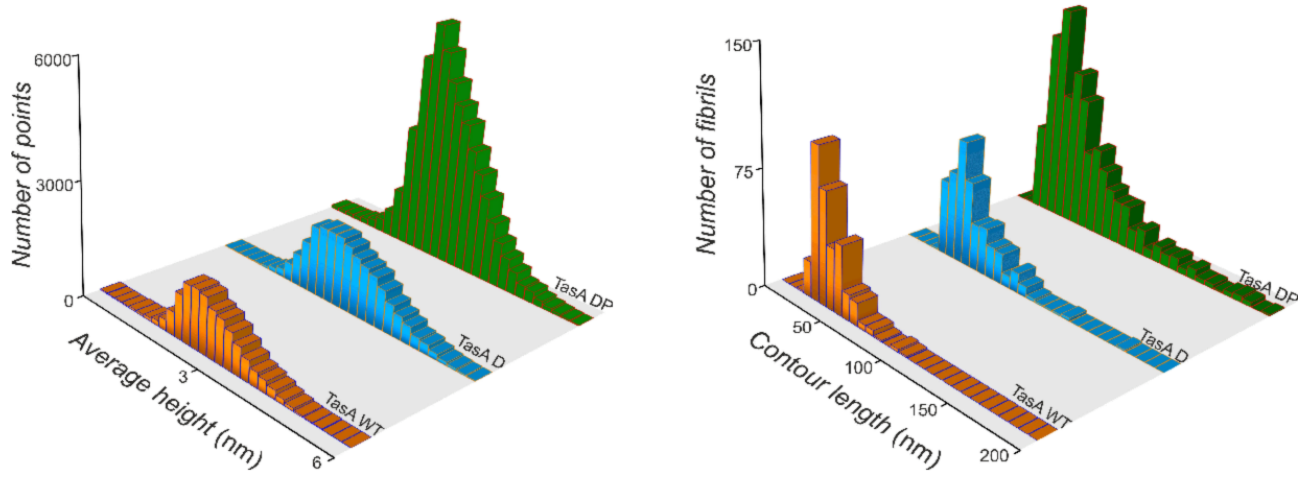

**Supplementary Figure 3. Morphological characterization of 28 days old TasA, TasA D and TasA DP fibrils using Atomic force microscopy (AFM).** AFM images analyzed by FiberApp software for quantification of average fibril height and contour length.

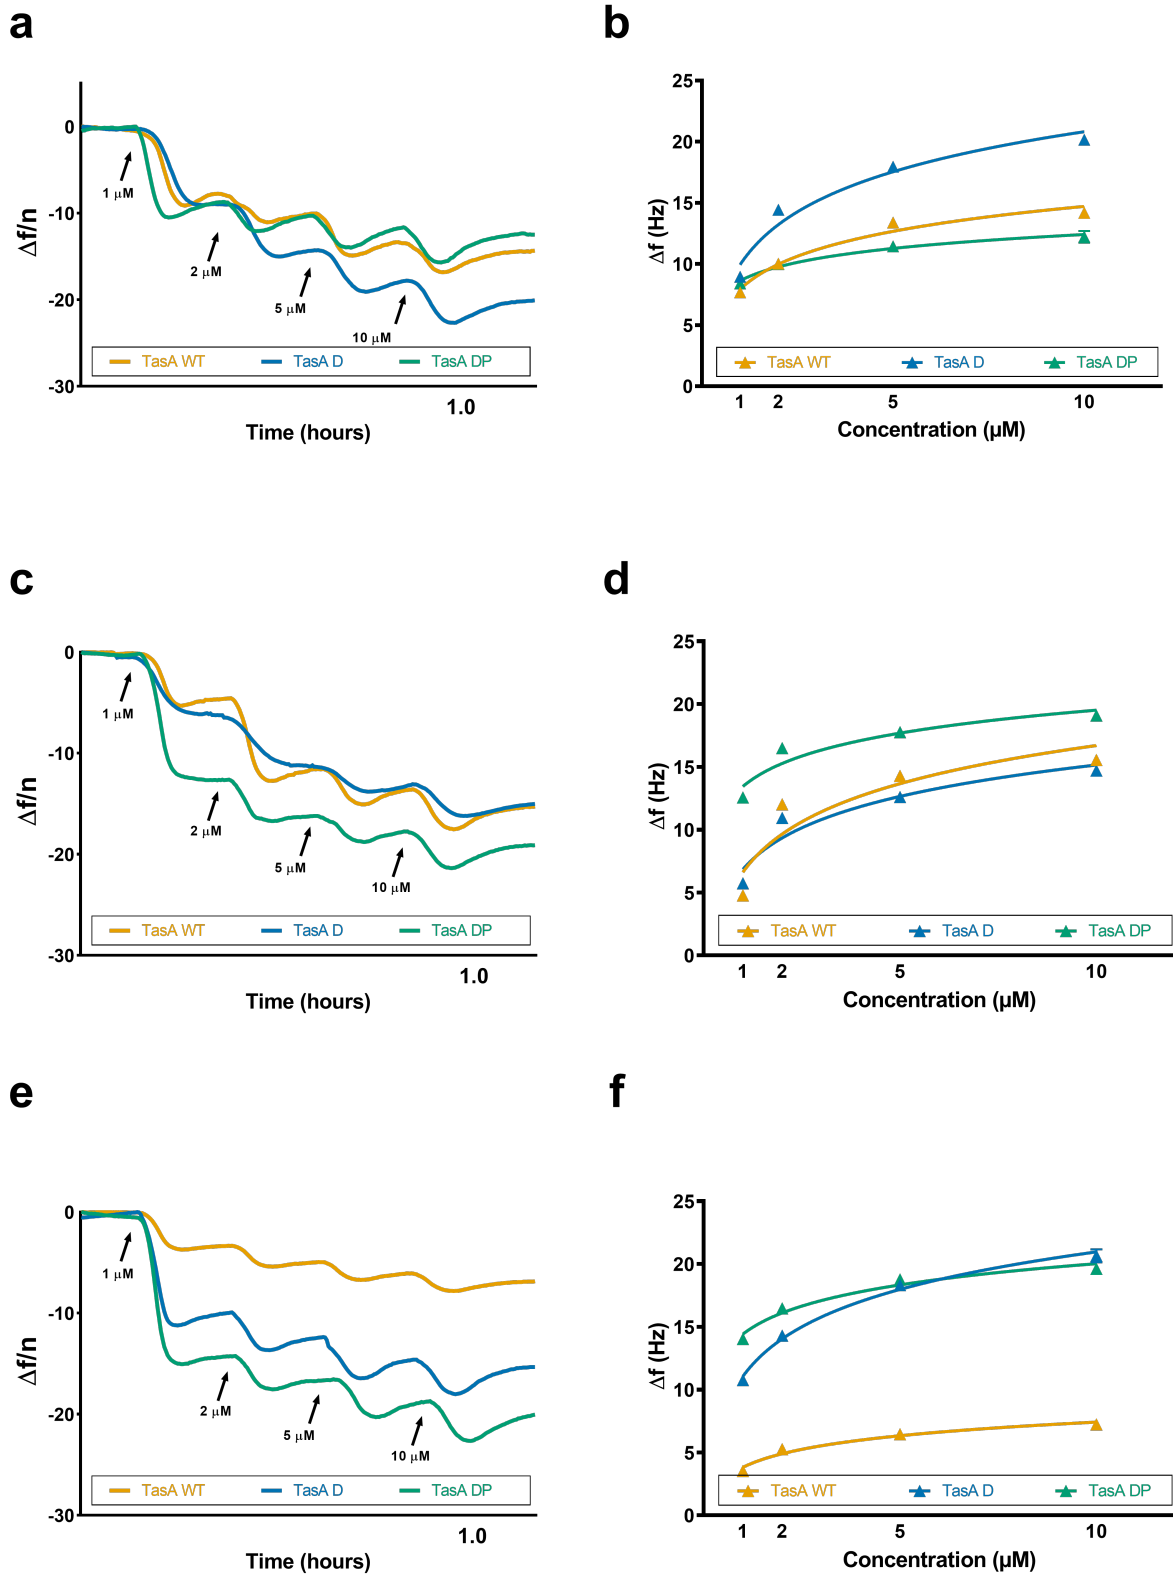

**Supplementary Figure 4. QCM frequency shifts with respect to time and with respect to protein concentration for (a-b). 1 day old, (c-d). 7 days old and (e-f). 28 days old samples.**

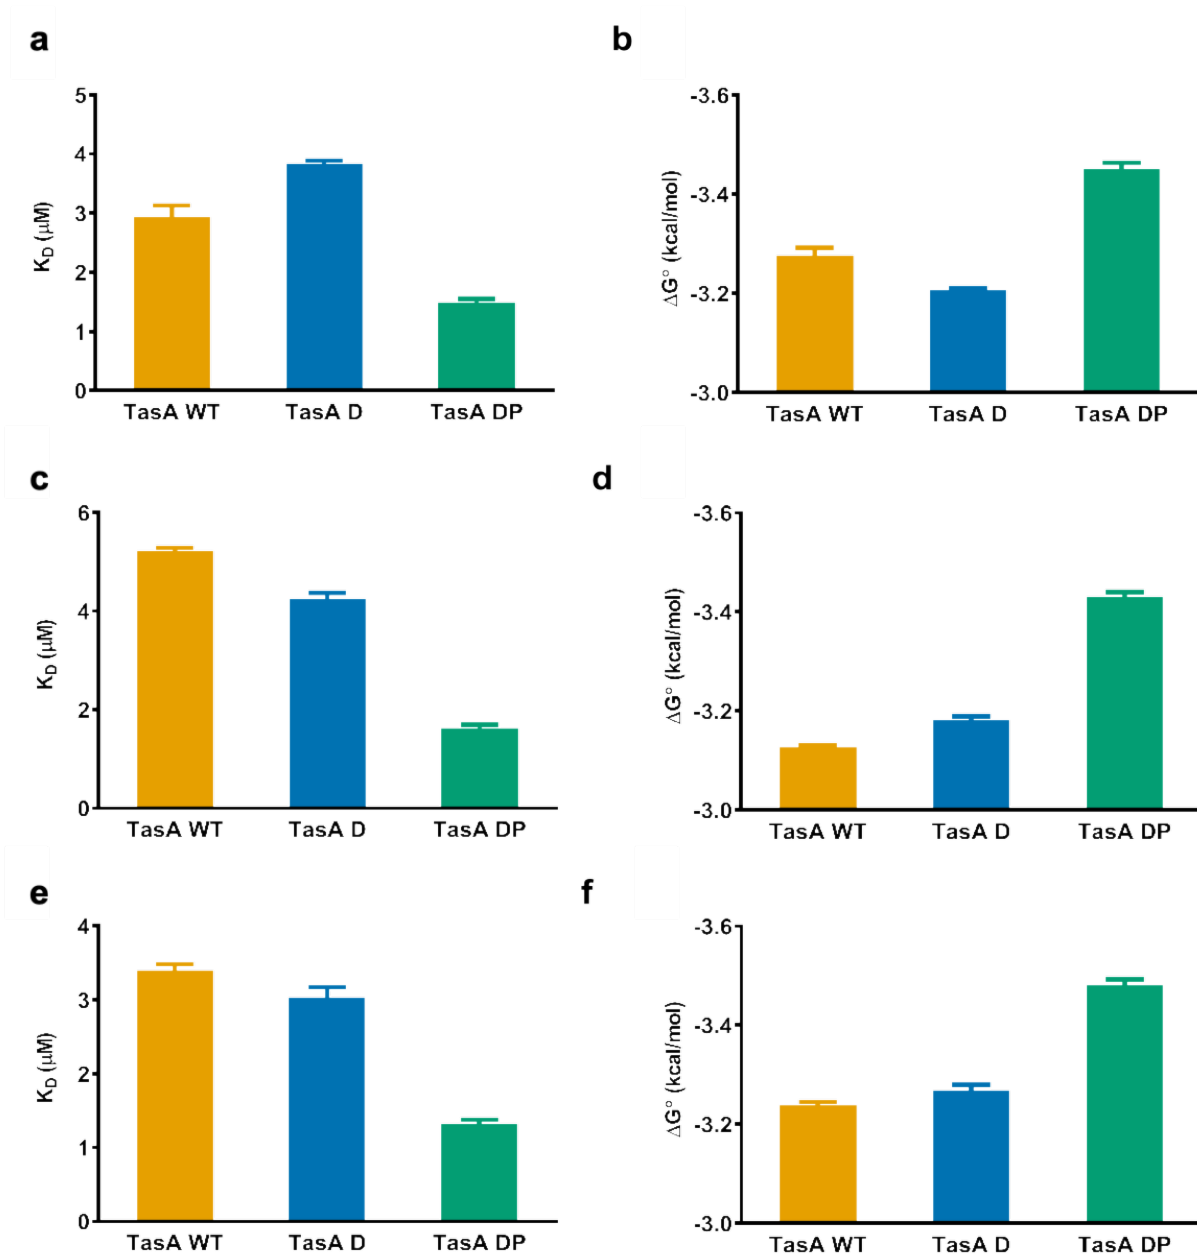

**Supplementary Figure 5.  $k_d$  and  $\Delta G^\circ$  graphs of (a-b). 1 day old, (c-d). 7 days old and (e-f). 28 days old samples. n=3.**



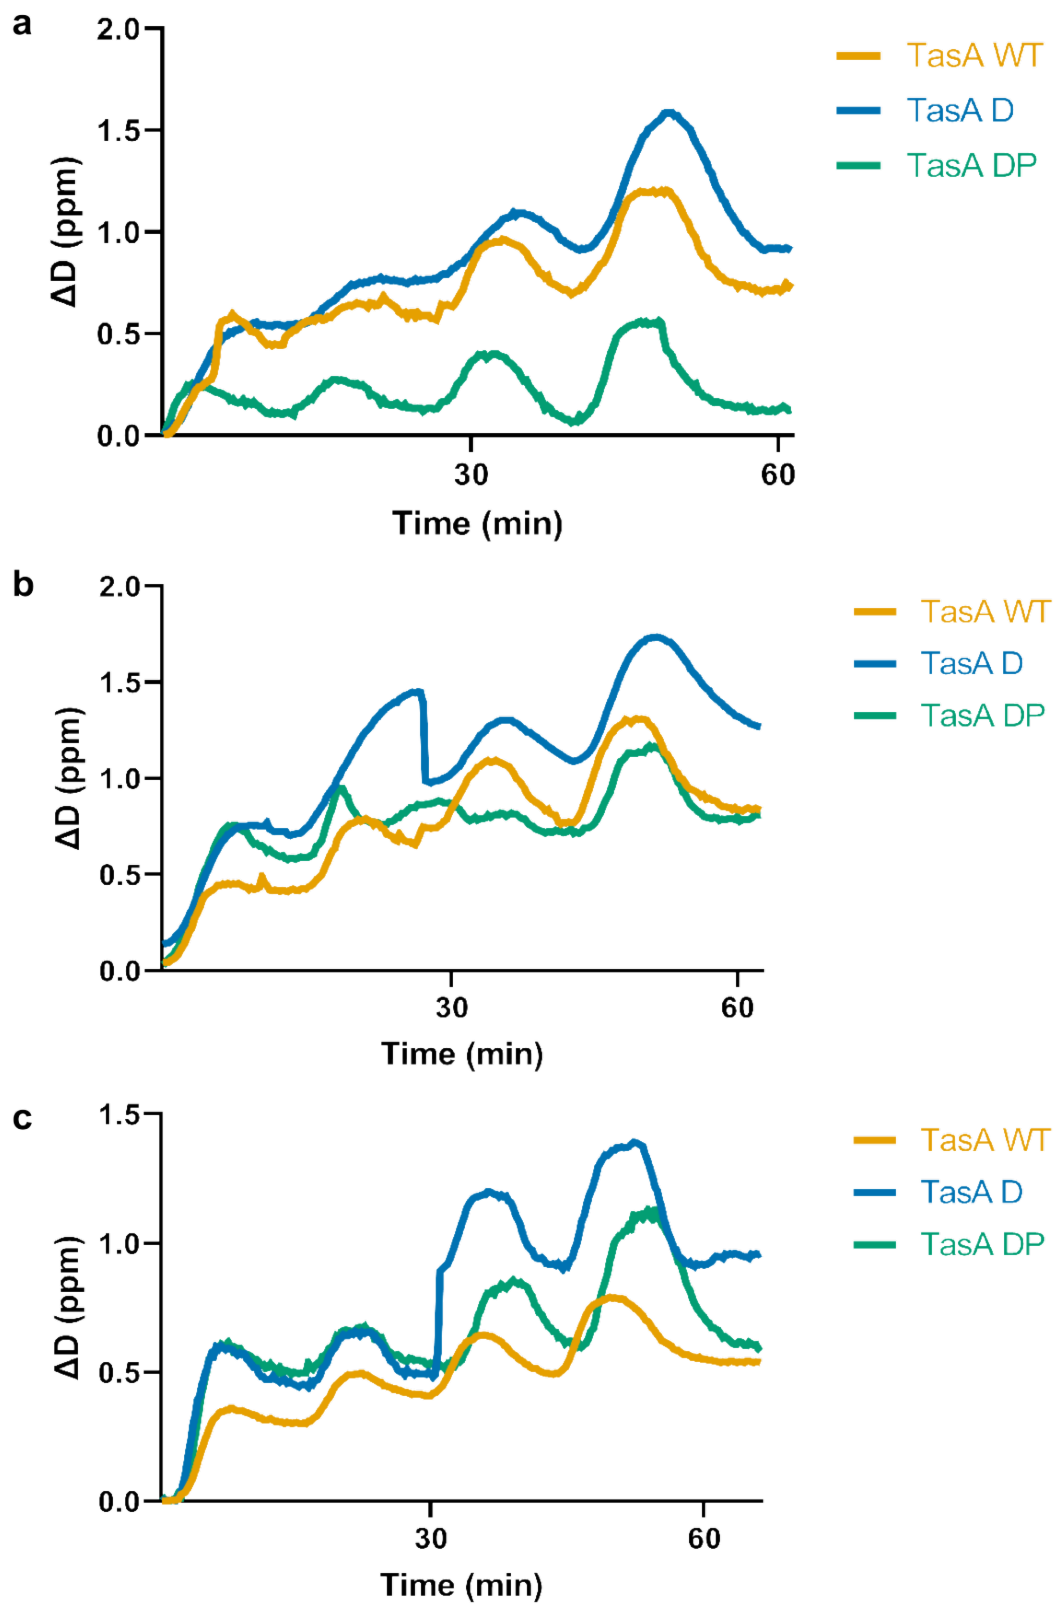

**Supplementary Figure 6. The recorded dissipation shifts in QCM-D upon adsorption with increasing concentrations of TasA, TasA-D and TasA-DP proteins with aging durations of a. 1 day b. 7 days and c. 28 days.**

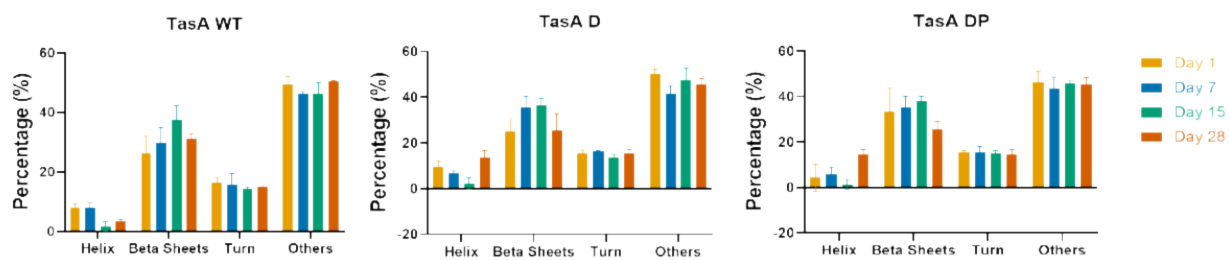

**Supplementary Figure 7. Percentages of secondary structures calculated by BestSel online tool from CD data of TasA, TasA-D and TasA-DP with different aging durations. n=3.**

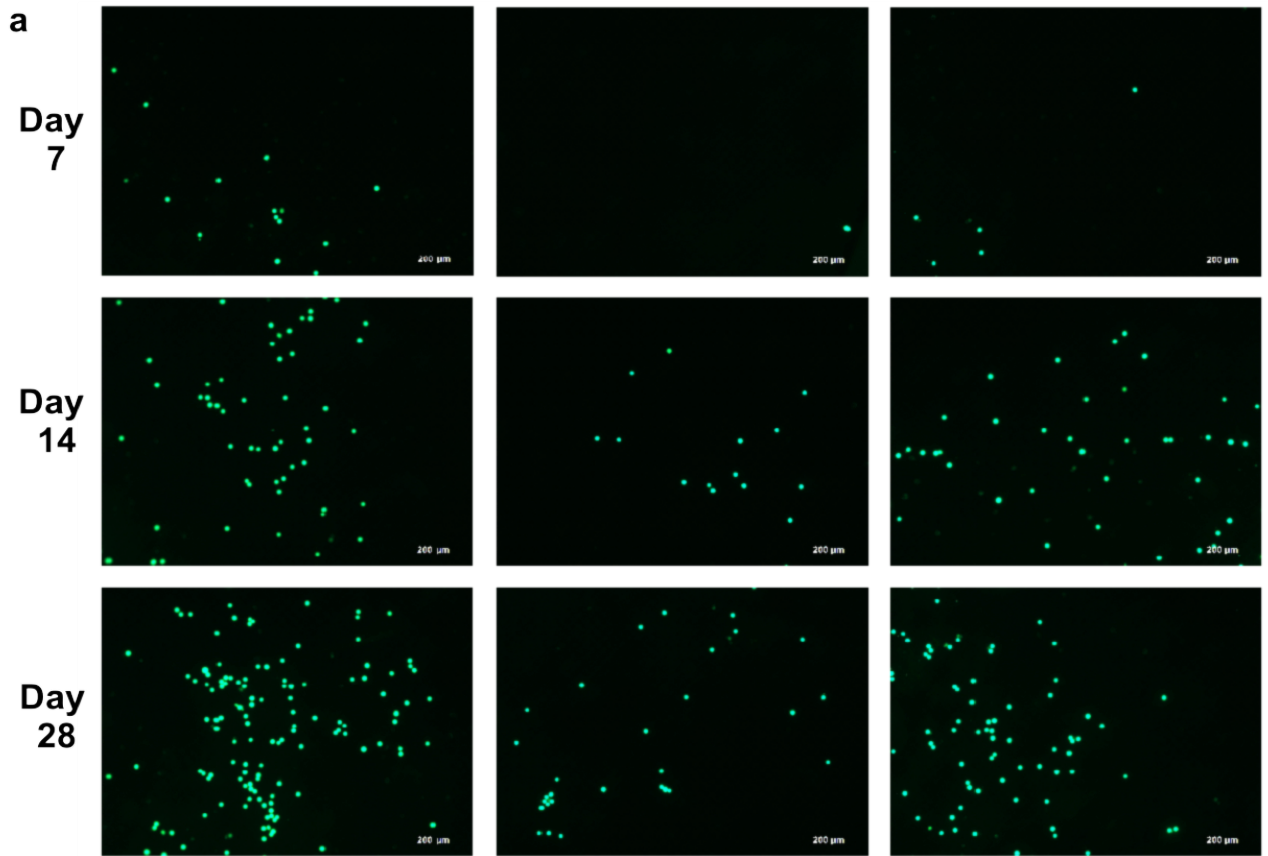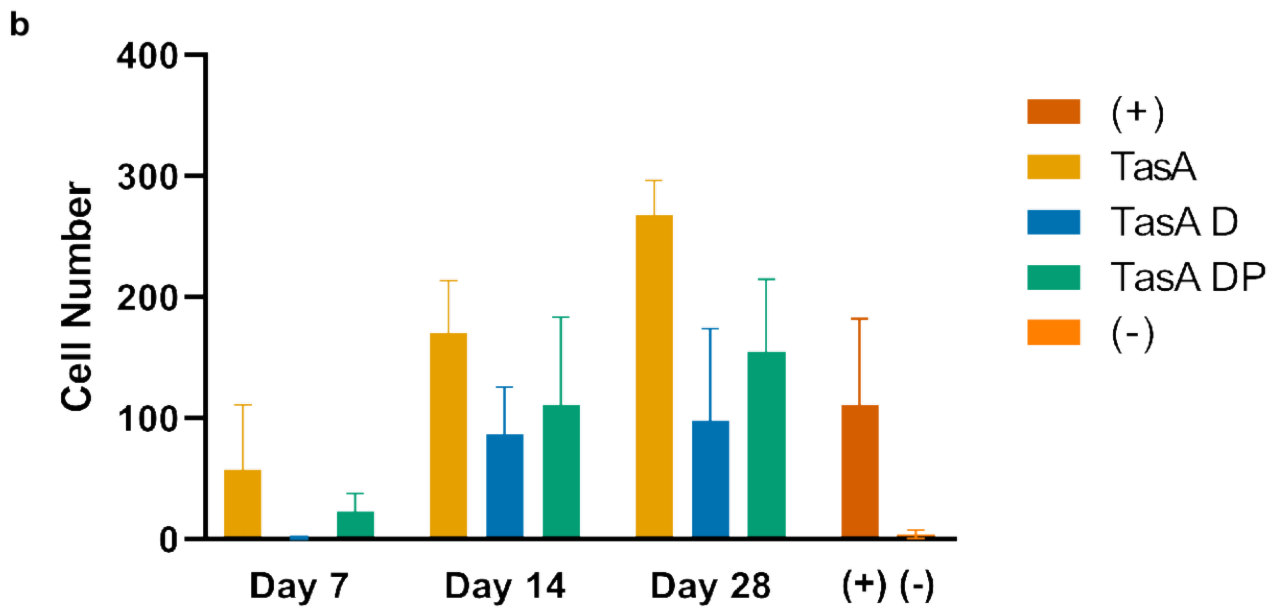

**Supplementary Figure 8. Adhesion of HEK293 cells on surfaces coated with differently aged TasA, TasA D and TasA DP.** a. Representative images of Calcein AM labelled adhered cells and b. Quantitative analysis of adhered number of cells, n=3.
